# Supplementary material
Source: publisher figshare collection journal article supplement (https://frontiersin.figshare.com/ndownloader/files/26819477)
Supplement: Supplementary file [file 26819477]

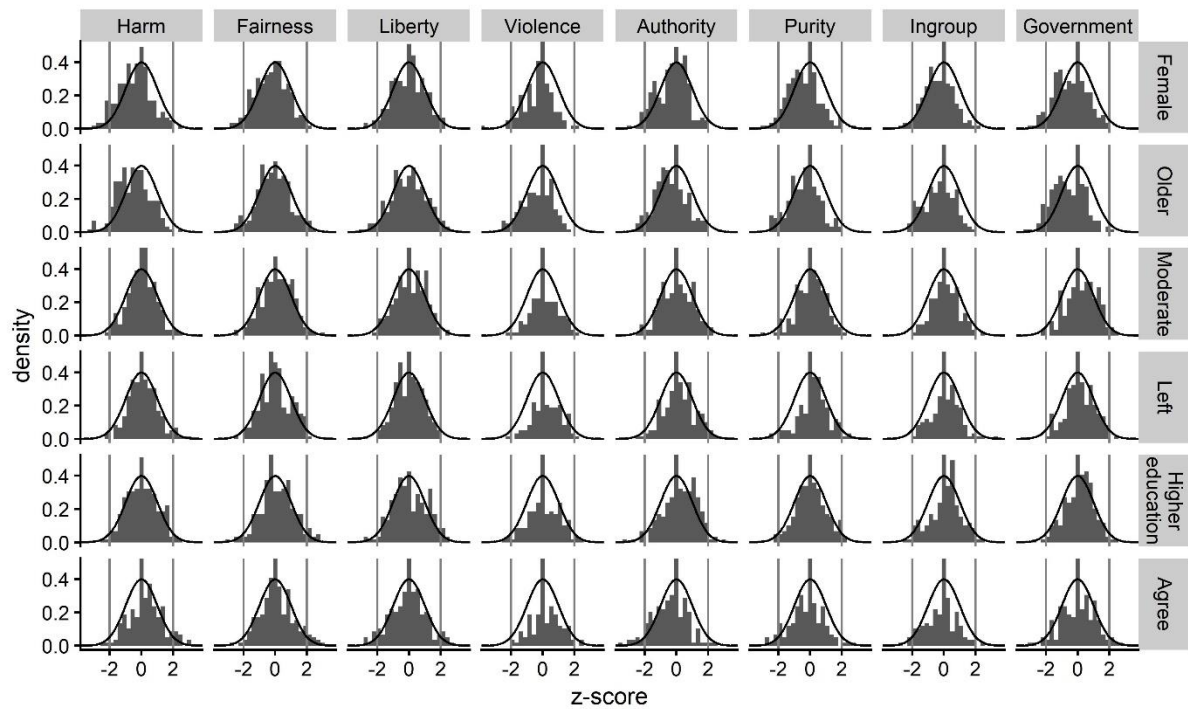

**Supplementary Figure 3.** We use logistic regression to explore the marginal effects of individual characteristics controlling for rater's own opinion as well their interactions. The histograms show distributions of Z-scores for the effect of sex, age, ideology, education, and agreement with the opinion on the probability to find each of the eight kinds of argument applicable to each of the 216 BSA opinions in the UK sample. For comparison, the black line shows the standard normal distribution. The vertical grey lines separate coefficients that are above or below zero by at least two standard errors. The y-axis scale is cut at 0.5 for better visibility, otherwise the bar representing the zero effect sometimes reach as high as 2.
